# Supplementary material for: Predictors of Maternal Serum Concentrations for Selected Persistent Organic Pollutants (POPs) in Pregnant Women and Associations with Birth Outcomes: A Cross-Sectional Study from Southern Malawi
Source: MDPI journal article supplement (doi:10.3390/ijerph20075289), 2023-03-28
Supplement: s1 [file s1]

**Supplementary Table S1:** Method detection limits (MDL) concentrations (wet weight pg/mL) for all POPs analysed at the laboratory.

| <b>POPs</b>           | <b>Mean MDL Concentrations</b> | <b>Median MDL Concentrations</b> | <b>Min - Max MDL Concentrations</b> |
|-----------------------|--------------------------------|----------------------------------|-------------------------------------|
| <i>o,p'</i> -DDE      | 0.3                            | 0.3                              | 0.07 to 1.53                        |
| <i>p,p'</i> -DDE      | 0.4                            | 0.3                              | 0.09 to 4.26                        |
| <i>o,p'</i> -DDD      | 0.6                            | 0.5                              | 0.20 to 1.44                        |
| <i>p,p'</i> -DDD      | 1.8                            | 1.5                              | 0.34 to 7.14                        |
| <i>o,p'</i> -DDT      | 0.7                            | 0.6                              | 0.09 to 2.99                        |
| <i>p,p'</i> -DDT      | 2.0                            | 1.8                              | 0.46 to 6.73                        |
| HCB                   | 1.1                            | 0.9                              | 0.02 to 12.74                       |
| Mirex                 | 6.2                            | 5.8                              | 0.76 to 23.85                       |
| a-HCH                 | 2.1                            | 1.8                              | 0.85 to 9.67                        |
| g-HCH                 | 2.1                            | 2.0                              | 0.79 to 7.59                        |
| b-HCH                 | 3.6                            | 3.5                              | 1.69 to 7.85                        |
| Heptachlor            | 0.3                            | 0.2                              | 0.002 to 2.89                       |
| t-CD                  | 0.5                            | 0.3                              | 0.01 to 8.51                        |
| c-CD                  | 0.5                            | 0.3                              | 0.02 to 8.37                        |
| t-NC                  | 1.8                            | 0.6                              | 0.02 to 24.44                       |
| cis-NC                | 0.9                            | 0.3                              | 0.02 to 28.94                       |
| Oxychlorane           | 6.6                            | 5.9                              | 0.05 to 35.33                       |
| cis-Heptachlorepoxide | 2.6                            | 2.3                              | 0.06 to 44.24                       |
| Dieldrin              | 6.3                            | 5.1                              | 0.07 to 41.35                       |
