# Supplementary material for: Predictors of Maternal Serum Concentrations for Selected Persistent Organic Pollutants (POPs) in Pregnant Women and Associations with Birth Outcomes: A Cross-Sectional Study from Southern Malawi
Source: MDPI journal article supplement (doi:10.3390/ijerph20075289), 2023-03-28
Supplement: s1 [file s1]

**Supplementary Table S2:** Socio-demographic characteristics of recruited women and their neonates

| Variable                   | Characteristic      | Place of residence |              |             | p-value             | Missing data (count) |
|----------------------------|---------------------|--------------------|--------------|-------------|---------------------|----------------------|
|                            |                     | Total              | Urban        | Rural       |                     |                      |
| Total participants (n)     |                     | 605                | 308          | 297         |                     |                      |
| Age (Years)                | Mean (SD)           | 24.8 (6.22)        | 25.6 (5.68)  | 23.9 (6.67) | <0.001 <sup>a</sup> | 1                    |
| Mode of delivery (%)       | CS                  | 91 (16.0)          | 53 (18.6)    | 38 (13.4)   | 0.111 <sup>b</sup>  | 37                   |
|                            | SVD                 | 474 (83.5)         | 229 (80.4)   | 245(86.6)   |                     |                      |
|                            | Breech              | 2 (0.4)            | 2 (0.7)      | 0 (0.0)     |                     |                      |
|                            | Vac extr            | 1 (0.2)            | 1 (0.4)      | 0 (0.0)     |                     |                      |
| Gravidity (%)              | 1                   | 220 (36.4)         | 78 (25.3)    | 142 (47.7)  | <0.001 <sup>b</sup> | 0                    |
|                            | 2                   | 157 (25.9)         | 106 (34.4)   | 51 (17.1)   |                     |                      |
|                            | 3                   | 117 (19.3)         | 73 (23.8)    | 44 (14.8)   |                     |                      |
|                            | 4                   | 111 (18.4)         | 51 (16.5)    | 60 (20.4)   |                     |                      |
| Parity (%)                 | 0                   | 207 (34.5)         | 61 (20.2)    | 146 (49.2)  | <0.001 <sup>b</sup> | 6                    |
|                            | 1                   | 137 (22.8)         | 86 (28.5)    | 51 (17.2)   |                     |                      |
|                            | 2                   | 256 (42.7)         | 155 (51.3)   | 100 (33.6)  |                     |                      |
| Maternal education (%)     | None / primary      | 325 (53.9)         | 118 (38.6)   | 207 (69.7)  | <0.001 <sup>b</sup> | 2                    |
|                            | Secondary/ Tertiary | 278 (46.1)         | 188 (61.4)   | 90 (30.3)   |                     |                      |
| Marital Status (%)         | Married             | 544 (90.0)         | 283 (91.9)   | 260 (87.6)  | 0.081 <sup>b</sup>  | 0                    |
|                            | Single              | 61 (10.0)          | 25 (8.1)     | 37 (12.4)   |                     |                      |
| Breast Feeding (%)         | Yes                 | 355 (59.1)         | 208 (68.0)   | 147 (49.8)  | <0.001 <sup>b</sup> | 4                    |
|                            | No                  | 246 (40.9)         | 98 (32.0)    | 148 (50.2)  |                     |                      |
| Drinking water source (%)  | Tap                 | 322 (53.5)         | 298 (96.8)   | 24 (8.2)    | <0.001 <sup>b</sup> | 3                    |
|                            | Lake/ s-well        | 137 (22.8)         | 2 (0.7)      | 135 (45.9)  |                     |                      |
|                            | Borehole            | 143 (23.8)         | 8 (2.6)      | 135 (45.9)  |                     |                      |
| Pesticides use at home (%) | Yes                 | 124 (20.5)         | 20 (6.5)     | 104 (35.1)  | <0.001 <sup>b</sup> | 1                    |
|                            | No                  | 480 (79.5)         | 288 (93.5)   | 192 (64.9)  |                     |                      |
| Fishing (%)                | Yes                 | 9 (1.5)            | 0 (0.0)      | 9 (3.0)     | 0.002 <sup>b</sup>  | 0                    |
|                            | No                  | 596 (98.5)         | 308 (100.0)  | 288 (97.0)  |                     |                      |
| Gestational age (weeks)    | Mean (SD)           | 37.58 (1.53)       | 37.47(1.43)  | 37.71(1.62) | 0.075 <sup>a</sup>  | 64                   |
| Birth weight (Kg)          | Mean (SD)           | 3.09 (0.47)        | 3.18 (0.46)  | 3.00(0.46)  | <0.001 <sup>a</sup> | 33                   |
| Birth length (cm)          | Mean (SD)           | 45.04 (4.28)       | 45.66(5.55)  | 44.51(2.65) | 0.002 <sup>a</sup>  | 64                   |
| Head circumference (cm)    | Mean (SD)           | 33.17 (1.83)       | 33.14 (1.94) | 33.19(1.72) | 0.845 <sup>a</sup>  | 64                   |

SD: standard deviation of mean

<sup>a</sup> Mann–Whitney U test (urban vs rural).

<sup>b</sup>Chi-square test (urban vs rural).
